# Supplementary material for: Differential tissue growth and cell adhesion alone drive early tooth morphogenesis: An ex vivo and in silico study
Source: PubMed Central journal article supplement (PMC5843354; doi:10.1371/journal.pcbi.1005981), 2018-02-26
Supplement: pcbi.1005981.s014.pdf [file pcbi.1005981.s014.pdf]

| Centroid size ANOVA     |                 |              |      |         |         |
|-------------------------|-----------------|--------------|------|---------|---------|
| Effect                  | SS              | MS           | df   | F       | P       |
| Tooth germ              | 19895189.299353 | 41534.841961 | 479  | 2598.39 | <0.0001 |
| Digitising error        | 7672.715663     | 15.984824    | 480  |         |         |
| Shape, Procrustes ANOVA |                 |              |      |         |         |
| Effect                  | SS              | MS           | df   | F       | P       |
| Tooth germ              | 52.16276651     | 0.0272248259 | 1916 | 139.1   | <0.0001 |
| Digitising error        | 0.3757972       | 0.0001957277 | 1920 |         |         |
